# Supplementary material for: Anodization of large area Ti: a versatile material for caffeine photodegradation and hydrogen production
Source: Royal Society of Chemistry journal article supplement (doi:10.1039/d2cy00593j), 2022-01-01
Supplement: d2cy00593j1.pdf [file d2cy00593j1.pdf]

## ELECTRONIC SUPPLEMENTARY INFORMATION

### Anodization of large area Ti: versatile material for caffeine photodegradation and hydrogen production

Marcel Sihor,<sup>a,b,#</sup> Muhammad Bilal Hanif,<sup>a,#</sup> Guru Karthikeyan Thirunavukkarasu,<sup>a</sup> Viktoriia Liapun,<sup>a</sup> Miroslava Filip Edelmannova,<sup>b</sup> Tomas Roch,<sup>c</sup> Leonid Satrapinskyy,<sup>c</sup> Tomas Plecenik,<sup>c</sup> Sajid Rauf,<sup>d</sup> Karol Hensel,<sup>e</sup> Olivier Monfort,<sup>a</sup> and Martin Motola<sup>a,\*</sup>

---

<sup>a</sup>Department of Inorganic Chemistry, Faculty of Natural Sciences, Comenius University in Bratislava, Ilkovicova 6, 842 15 Bratislava, Slovakia.

<sup>b</sup>Institute of Environmental Technology, CEET, VSB-Technical University of Ostrava, 17. listopadu 15/2172, Ostrava-Poruba, 708 00Czech Republic.

<sup>c</sup>Department of Experimental Physics, Faculty of Mathematics, Physics, and Informatics, Comenius University in Bratislava, 842 48 Bratislava, Slovakia.

<sup>d</sup>College of Electronics and Information Engineering, Shenzhen University, Guangdong Province, 518000, China

<sup>e</sup>Division of Environmental Physics, Faculty of Mathematics, Physics, and Informatics, Comenius University in Bratislava, 842 48 Bratislava, Slovakia.

\*Corresponding author: Martin Motola [martin.motola@uniba.sk](mailto:martin.motola@uniba.sk)

# Equal contribution

#### Text S1. Photoelectrochemical Measurements

Photoelectrochemical measurements were performed using a photoelectric spectrometer with a 150W Xe lamp used as an irradiation source equipped with a P-IF 1.6 potentiostat (Instytut Fotonowy, Poland). A three-electrode photoelectrochemical cell consisting of TNSs samples (working electrode), saturated Ag/AgCl electrode (reference electrode), and Pt electrode (counter electrode), respectively were immersed in 0.2 M KNO<sub>3</sub> electrolyte solution. The photocurrent transients were recorded under 300 to 420 nm wavelength light irradiation.

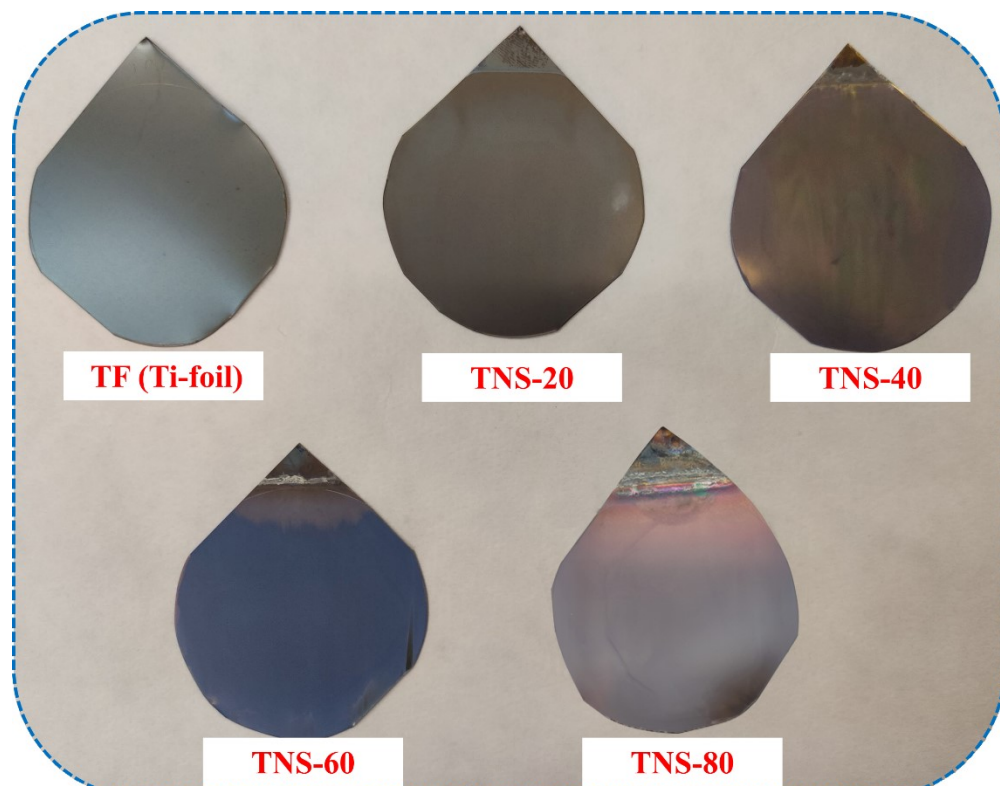

**Fig. S1** Titanium foil (of different voltages) after the anodization and calcination process.

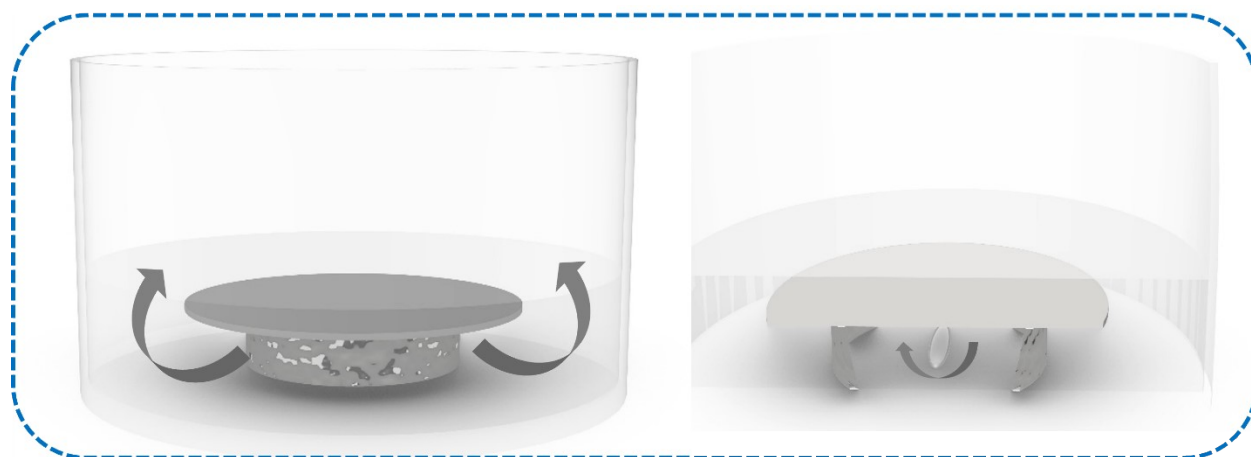

**Fig. S2** Schematic representation of home-made photocatalytic reactor.

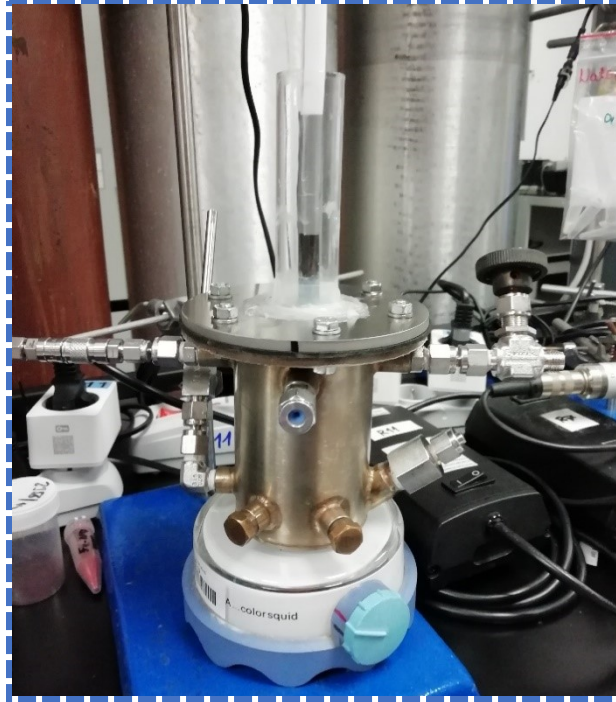

**Fig. S3** The batch photoreactor used in the photocatalytic decomposition of methanol.

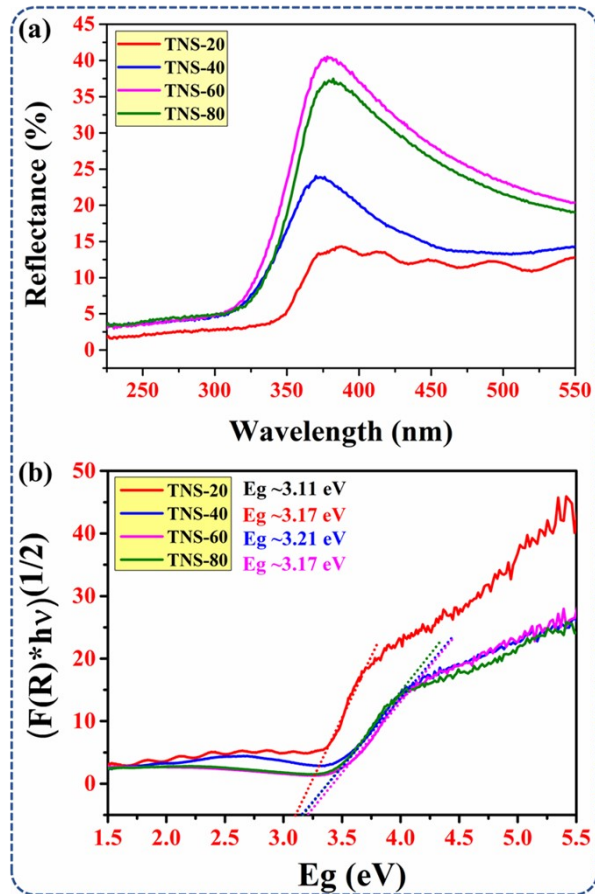

Fig. S4 (a) UV-VIS DRS and (b) Tauc plot with the  $E_g$  of TNS-20, TNS-40, TNS-60, and TNS-80, respectively.

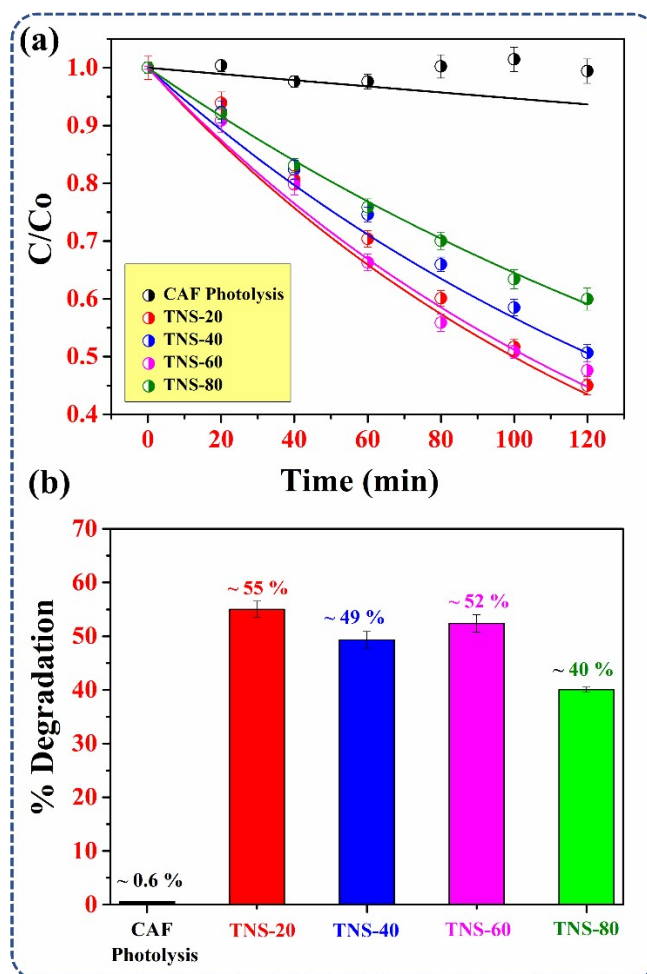

Fig. S5 Photocatalytic degradation of caffeine using TNSs samples (a)  $C/C_0$  curves and (b) degradation % under UV-A irradiation.

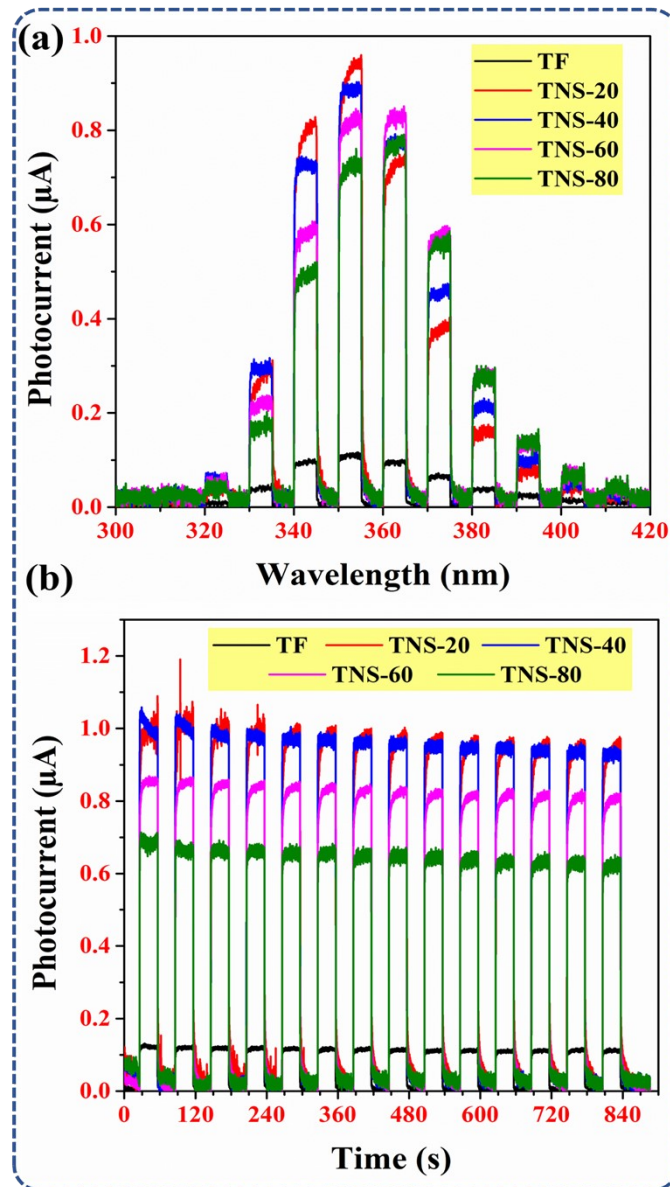

Fig. S6 (a) Photocurrent densities of TNSs samples with (b) corresponding transient currents from 300 to 420 nm.

Table S1: The electrochemical anodization parameters during the synthesis of TNS samples.

| Sample | Voltage (V) | Time (min) | Current Density<br>(A)<br>Starting | Current Density<br>(A)<br>Ending |
|--------|-------------|------------|------------------------------------|----------------------------------|
| TF     | -           | -          | -                                  | -                                |
| TNS-20 | 20          | 100        | 0.305                              | 0.040                            |

|               |    |     |       |       |
|---------------|----|-----|-------|-------|
| <b>TNS-40</b> | 40 | 100 | 0.370 | 0.035 |
| <b>TNS-60</b> | 60 | 100 | 0.320 | 0.035 |
| <b>TNS-80</b> | 80 | 100 | 0.361 | 0.039 |

**Table S2:** The Average Roughness ( $S_a$ ), Root Mean Square ( $S_q$ ), and Surface Skewness ( $S_{sk}$ ), and Coefficient of Kurtosis ( $S_{ka}$ ) values obtained from atomic force microscopy.

| <b>Sample</b> | <b>Average Roughness<br/><math>S_a</math> (nm)</b> | <b>Root Mean Square<br/><math>S_q</math> (nm)</b> | <b>Surface Skewness<br/><math>S_{sk}</math></b> | <b>Coefficient of<br/>kurtosis <math>S_{ka}</math></b> |
|---------------|----------------------------------------------------|---------------------------------------------------|-------------------------------------------------|--------------------------------------------------------|
| <b>TF</b>     | 43.625                                             | 55.858                                            | 0.110                                           | 0.191                                                  |
| <b>TNS-20</b> | 74.039                                             | 92.373                                            | 0.423                                           | -0.097                                                 |
| <b>TNS-40</b> | 61.691                                             | 78.719                                            | 0.212                                           | 0.516                                                  |
| <b>TNS-60</b> | 81.298                                             | 102.138                                           | 0.359                                           | 0.063                                                  |
| <b>TNS-80</b> | 122.047                                            | 150.843                                           | 0.187                                           | -0.352                                                 |

**Table S3:** A summary of different areas of  $TiO_2$  photocatalysts under UV light irradiation. Wherever was possible, the area, parameters, target pollutant with its concentration, rate constants, time duration, and  $H_2$  production were supplemented from the given references.

| <b>Material</b>                       | <b>Area</b>        | <b>Anodization<br/>conditions</b>                                                       | <b>Target<br/>pollutant and<br/>concentration</b> | <b>Pollutant<br/>Degradation<br/>rate (<math>k</math>)/<br/>Percentage (%)</b> | <b>Time<br/>(min)</b> | <b><math>H_2</math><br/>production</b> | <b>Ref</b> |
|---------------------------------------|--------------------|-----------------------------------------------------------------------------------------|---------------------------------------------------|--------------------------------------------------------------------------------|-----------------------|----------------------------------------|------------|
| <b>TNT-10um</b>                       | (10×50×<br>0.1 mm) | 3-vol% $H_2O$ + 0.5-wt%<br>$NH_4F$ in EG electrolyte<br>(60V for 2-20 min)              | Acid orange<br>(25 $\mu M$ )                      | 0.019<br>$min^{-1}$                                                            | 150                   | ---                                    | 1          |
| <b><math>TiO_2</math>-NTs</b>         | 146.09<br>$mm^2$   | 95 : 5 wt% ethylene<br>glycol/water<br>containing 0.15M<br>$NH_4F$<br>(40 V for 20 min) | ---                                               | ---                                                                            | ---                   | ---                                    | 2          |
| <b>TNT- <math>TiO_2</math></b>        | 5×10 $cm^2$        | 176 mM $NH_4F$ + 1.5<br>vol% DI- $H_2O$<br>(60 V for 4 h)                               | ---                                               | ---                                                                            | ---                   | ---                                    | 3          |
| <b>TNTs+2c<br/><math>MoS_2</math></b> | 2.25 $cm^2$        | Prepared by atomic<br>layer deposition                                                  | Methylene<br>blue<br>( $1 \times 10^{-5}$ M)      | 0.0190 $min^{-1}$                                                              | 120                   | ---                                    | 4          |
| <b><math>TiO_2</math></b>             | 12.5 $cm^2$        | 0.3 wt.% $NH_4F$ and 2<br>vol.% $H_2O$ in -EG<br>electrolyte                            | ---                                               | ---                                                                            | ---                   | ---                                    | 5          |

|                                                            |                       |                                                                                                                            |                                             |                                                         |            |                  |                       |
|------------------------------------------------------------|-----------------------|----------------------------------------------------------------------------------------------------------------------------|---------------------------------------------|---------------------------------------------------------|------------|------------------|-----------------------|
| <b>TiO<sub>2</sub>-SG</b>                                  | 5×10 cm <sup>2</sup>  | (60 V for 72 h)<br>0.5 wt% -EG<br>electrolyte + NH <sub>4</sub> F and<br>0.2 wt% DI-H <sub>2</sub> O<br>(40V for 4 h)      | Methylene<br>blue<br>(3×10 <sup>-5</sup> M) | 0.003 s <sup>-1</sup>                                   | ---        | ---              | 6                     |
| <b>TiO<sub>2</sub></b>                                     | 50 cm <sup>2</sup>    | 0.3 wt.% of NH <sub>4</sub> F +2<br>vol.% of DI-H <sub>2</sub> O in an<br>ethylene glycol<br>electrolyte<br>(60 V for 6 h) | Caffeine<br>(50 mM.)                        | 44%                                                     | 180        | ---              | 7                     |
| <b>Pine-cone<br/>TiO<sub>2</sub></b>                       | 30 mm ×<br>40 mm      | 0.6 wt % NH <sub>4</sub> F -10 vol<br>% H <sub>2</sub> O-EG electrolyte<br>(60 V for 2 h)                                  | Methylene<br>orange<br>(20.0 mM)            | 85%                                                     | 120        | ---              | 8                     |
| <b>TiO<sub>2</sub>NTs@<br/>Fe<sub>3</sub>O<sub>4</sub></b> | 2.25 cm <sup>2</sup>  | 0.15 M NH <sub>4</sub> F + 10% DI-<br>H <sub>2</sub> O in glycol-based<br>electrolyte<br>(100 V for 4 h)                   | Methylene<br>blue<br>(1×10 <sup>-5</sup> M) | 0.38 h <sup>-1</sup>                                    | 120        | ---              | 9                     |
| <b>TiO<sub>2</sub></b>                                     | 10 mm x<br>15 mm      | 0.5 wt.% NH <sub>4</sub> F+10%<br>DI-H <sub>2</sub> O + 90 vol.% EG<br>(30 V for 1 h)                                      | Methylene<br>orange                         | 0.00040 min <sup>-1</sup>                               | 240        | ---              | 10                    |
| <b>TiO<sub>2</sub> film</b>                                | 25 × 25 × 1<br>mm     | NH <sub>4</sub> F (0.3 wt %) and<br>H <sub>2</sub> O (2 vol%) in EG<br>(60V for 3h)                                        | Caffeine (10<br>mg.L <sup>-1</sup> )        | 1.882 mmol.L <sup>-1</sup><br>h <sup>-1</sup>           | ---        | ---              | 11                    |
| <b>TiO<sub>2</sub><br/>nanotube<br/>films</b>              | 98.5 mm<br>diamter    | NH <sub>4</sub> F (0.3 wt %) and<br>H <sub>2</sub> O (2 vol%) in EG<br>(60V for 6 h)                                       | Caffeine (50<br>mg.L <sup>-1</sup> )        | 60%/<br>0.014 × 10 <sup>-6</sup><br>mol.L <sup>-1</sup> | 180        | ---              | 12                    |
| <b>TiO<sub>2</sub> NTs</b>                                 | ---                   | NH <sub>4</sub> F (0.3 wt %) and<br>H <sub>2</sub> O (2 vol%) in EG<br>(60V for 3 h)                                       | Caffeine<br>10 ppm                          | 1.65 × 10 <sup>-2</sup> min <sup>-1</sup>               | 180        | ---              | 13                    |
| <b>V-TNT</b>                                               | ~0.79 cm <sup>2</sup> | 1.3 g NH <sub>4</sub> F + 197 mL<br>EG + 3 mL H <sub>2</sub> O<br>(60 V for 4 h)                                           | Caffeine<br>(20 ppm)                        | 3.25 × 10 <sup>-3</sup> min <sup>-1</sup>               | 120        | ---              | 14                    |
| <b>TNS-20</b>                                              | ~20 cm <sup>2</sup>   | <b>2g NH<sub>4</sub>F +100 ml DI-<br/>H<sub>2</sub>O in glycerol-based<br/>electrolyte<br/>(20 V for 100 min)</b>          | <b>Caffeine<br/>(20 ppm)</b>                | <b>0.0069 min<sup>-1</sup></b>                          | <b>120</b> | <b>~6200 ppm</b> | <b>This<br/>Study</b> |

## References

- 1 H. Il Kim, D. Kim, W. Kim, Y. C. Ha, S. J. Sim, S. Kim and W. Choi, *Appl. Catal. A Gen.*, 2016, 174–181.
- 2 E. Mena, M. J. Martín de Vidales, S. Mesones and J. Marugán, *Catal. Today*, 2018, **313**, 33–39.
- 3 H. Sopha, M. Baudys, M. Krbal, R. Zazpe, J. Prikryl, J. Krysa and J. M. Macak, *Electrochem. commun.*, 2018, **97**, 91–95.
- 4 M. Motola, M. Baudys, R. Zazpe, M. Krbal, J. Michalička, J. Rodriguez-Pereira, D. Pavliňák, J. Prikryl, L. Hromádko, H. Sopha, J. Krýsa and J. M. Macak, *Nanoscale*, 2019, **11**, 23126–23131.

- 5 M. Paulose, L. Peng, K. C. Popat, O. K. Varghese, T. J. LaTempa, N. Bao, T. A. Desai and C. A. Grimes, *J. Memb. Sci.*, 2008, **319**, 199–205.
- 6 M. Motola, L. Satrapinsky, T. Roch, J. Šubrt, J. Kupčík, M. Klementová, M. Jakubičková, F. Peterka and G. Plesch, *Catal. Today*, 2017, **287**, 59–64.
- 7 L. Suhadolnik, Ž. Marinko, M. Ponikvar-Svet, G. Tavčar, J. Kovač and M. Čeh, *J. Phys. Chem. C*, 2020, **124**, 4073–4080.
- 8 Y. Liu, Y. Zhang, L. Wang, G. Yang, F. Shen, S. Deng, X. Zhang, Y. He, Y. Hu and X. Chen, *Catal. 2017, Vol. 7, Page 229*, 2017, **7**, 229.
- 9 D. Beketova, M. Motola, H. Sopha, J. Michalicka, V. Cicmancova, F. Dvorak, L. Hromadko, B. Frumarova, M. Stoica and J. M. Macak, *ACS Appl. Nano Mater.*, 2020, **3**, 1553–1563.
- 10 H. Li, L. Cao, W. Liu, G. Su and B. Dong, *Ceram. Int.*, 2012, **38**, 5791–5797.
- 11 M. Krivec, K. Žagar, L. Suhadolnik, M. Čeh and G. Dražić, *ACS Appl. Mater. Interfaces*, 2013, **5**, 9088–9094.
- 12 L. Suhadolnik, Ž. Marinko, M. Ponikvar-Svet, G. Tavčar, J. Kovač and M. Čeh, *J. Phys. Chem. C*, 2020, **124**, 4073–4080.
- 13 Ž. Marinko, L. Suhadolnik, B. Šetina Batič, V. S. Šelih, B. Majaron, J. Kovač and M. Čeh, *ACS Omega*, 2021, **6**, 23233–23242.
- 14 G. K. Thirunavukkarasu, S. Gowrisankaran, M. Caplovicova, L. Satrapinsky, M. Gregor, A. Lavrikova, J. Gregus, R. Halko, G. Plesch, M. Motola and O. Monfort, *Dalt. Trans.*, , DOI:10.1039/D2DT00829G.
